# Supplementary material for: Metabolic engineering to expand the substrate spectrum of Pseudomonas putida toward sucrose
Source: PubMed Central journal article supplement (PMC5552902; doi:10.1002/mbo3.473), 2017-03-27
Supplement: MBO3-6-na-s001.pdf [file MBO3-6-na-s001.pdf]

# SUPPORTING INFORMATION

for

## **Metabolic engineering to expand the substrate spectrum of *Pseudomonas putida* towards sucrose**

by

*Hannes Löwe, Lukas Schmauder, Karina Hobmeier, Andreas Kremling, and  
Katharina Pflüger-Grau \**

*Fachgebiet für Systembiotechnologie, Fakultät für Maschinenwesen, Technische Universität  
München, 85748 Garching (Germany)*

Short title: Sucrose-consuming *Pseudomonas putida*

\* For correspondence: Katharina Pflüger-Grau, Fachgebiet für Systembiotechnologie, Technische Universität München, Boltzmannstr. 15, 85748 Garching, Germany, Tel.: +49 89 289 15765; Fax.: +49 89 289 15766, Email: k.pflueger-grau@tum.de

**This file contains:****Supplementary tables**

|                                                                                       |   |
|---------------------------------------------------------------------------------------|---|
| Table S1: Bacterial strains that were used in this work.....                          | 3 |
| Table S2: Oligonucleotides used for cloning in this study.....                        | 4 |
| Table S3: Plasmids used and constructed in this work.....                             | 5 |
| Table S4: Growth rates of individual clones of <i>P. putida</i> :: <i>cscAB</i> ..... | 6 |

**Supplementary figures**

|                                                                                                                                                     |   |
|-----------------------------------------------------------------------------------------------------------------------------------------------------|---|
| Figure S1: Schematic map of the vectors and plasmids .....                                                                                          | 7 |
| Figure S2: Localization of <i>cscAB</i> integration along the chromosome of <i>P. putida</i> .....                                                  | 8 |
| Figure S3: Competition of <i>P. putida</i> (pSEVA224- <i>cscA</i> ) and <i>P. putida</i> (pSEVA224- <i>cscAB</i> )<br>during growth on sucrose..... | 9 |

|                         |    |
|-------------------------|----|
| <b>References</b> ..... | 10 |
|-------------------------|----|

**Table S1** | Bacterial strains that were used in this work

| Bacterial strain                                 | Genotype                                                                                                                                                                                                                                                                                           | Function                           | Reference                        |
|--------------------------------------------------|----------------------------------------------------------------------------------------------------------------------------------------------------------------------------------------------------------------------------------------------------------------------------------------------------|------------------------------------|----------------------------------|
| <i>E. coli</i> DH5 $\alpha$                      | F <sup>-</sup> $\lambda^-$ <i>endA1 glnX44(AS) thiE1 recA1 relA1 spoT1 gyrA96(Nal<sup>R</sup>) rfbC1 deoR nupG <math>\Phi</math>80(lacZ<math>\Delta</math>M15) <math>\Delta</math>(argF-lac)U169 hsdR17(r<sub>K</sub><sup>-</sup> m<sub>K</sub><sup>+</sup>)</i>                                   | Cloning host                       | Grant <i>et al.</i> , 1990       |
| <i>E. coli</i> DH5 $\alpha$ $\lambda$ pir        | F <sup>-</sup> $\lambda^-$ <i>endA1 glnX44(AS) thiE1 recA1 relA1 spoT1 gyrA96(Nal<sup>R</sup>) rfbC1 deoR nupG <math>\Phi</math>80(lacZ<math>\Delta</math>M15) <math>\Delta</math>(argF-lac)U169 hsdR17(r<sub>K</sub><sup>-</sup> m<sub>K</sub><sup>+</sup>), <math>\lambda</math> pir lysogen</i> | Cloning host                       | Laboratory collection            |
| <i>R. eutropha</i> H16                           | wild-type                                                                                                                                                                                                                                                                                          | Expression host; production strain | Wilde, 1962                      |
| <i>P. putida</i> KT2440 EM178 <i>att::YFP-Gm</i> | Derivative of KT2440; $\Delta$ PP3849-PP3920 (prophage 1) $\Delta$ PP3026-PP3066 (prophage 2) $\Delta$ PP2266-PP2297 (prophage 3) $\Delta$ PP1532-PP1586 (prophage 4); constitutively expressed eYFP inserted into <i>att</i> -site via a Mini-Tn7 transposon                                      | Expression host; production strain | This work                        |
| <i>E. coli</i> HB101                             | F <sup>-</sup> $\lambda^-$ <i>hsdS20(r<sub>B</sub><sup>-</sup> m<sub>B</sub><sup>-</sup>) recA13 leuB6(Am) araC14 <math>\Delta</math>(gpt-proA)62 lacY1 galK2(Oc) xyl-5 mtl-1 thiE1 rpsL20(Sm<sup>R</sup>) glnX44(AS)</i>                                                                          | Helper strain for conjugation      | Boyer and Roulland-Dussoix, 1969 |
| <i>E. coli</i> W (DSM 1116)                      | Wild type                                                                                                                                                                                                                                                                                          | Source of genes                    | Waksman and Reilly, 1945         |

**Table S2** | Oligonucleotides used for cloning in this study with name, sequence and function. Start codons are underlined, restrictions sites are in italics, and Shine-Dalgarno sequences are presented in bold.

| <b>Name</b>      | <b>Sequence</b>                                                           | <b>Function</b>                                                                              |
|------------------|---------------------------------------------------------------------------|----------------------------------------------------------------------------------------------|
| cscB_SD_fw       | TTTTGGATCC <b>AGGAGG</b> CTTCATATGGCAC<br>TGAATATTCC                      | Amplification of <i>cscB</i>                                                                 |
| rvPrimer_cscB    | TTTTGGATCCATGGCACTGAATATTCC                                               |                                                                                              |
| cscA_SD_fw       | TTTTGAATTC <b>AGGAGG</b> CTTCATATGACGCA<br>ATCTCG                         | Amplification of <i>cscA</i>                                                                 |
| rvPrimer_cscA    | AAAAGGATCCTTAACCCAGTAGCCAGAG                                              |                                                                                              |
| fwP_cscAB_SacI   | TTTTGAGCTCTTGACAATTAATCATCCGGC<br>TCGTATAATGTGTGGCAATTTACACCCTA<br>GG     | Cloning of a polycistronic <i>cscAB</i> construct into pBAMD1-2 with a constitutive promoter |
| rvP_cscAB_PstI   | AAAAGGATCCTTAACCCAGTAGCCAGAG<br>GCGTTTCCATAACTATTTGC                      |                                                                                              |
| GFPT(Xmal)_for   | TTTTTTCCCGGGATGAGTAAAGGAGAAGAA<br>CTTTTCA                                 | Construction of pVLT_ <i>gfp</i>                                                             |
| fwP_cscB_SD_Eco2 | TTTTGAATTC <b>AGGAGG</b> CTTCATATGGCACT<br>GAATATTCC                      | Construction of a <i>cscB-gfp</i> fusion protein with pVLT_ <i>gfp</i> _SD                   |
| rvP_cscB_L_SacI  | AAAAGAGCTCGAGAATTCGCCACTTCCAG<br>CCGCACTACCTGCACTGCCTATTGCTGAA<br>GGTACAG |                                                                                              |
| rvP_seq_pVLTgfp  | GAATTGGGACAACTCCAGTG                                                      | Sequencing of the <i>cscB-gfp</i> fusion protein on pVLT_ <i>cscB_gfp</i>                    |

**Table S3** | Plasmids used and constructed in this work

| <b>Plasmid name</b>            | <b>Description</b>                                                                                                                                                      | <b>Source or reference</b>           |
|--------------------------------|-------------------------------------------------------------------------------------------------------------------------------------------------------------------------|--------------------------------------|
| pSEVA224                       | Cloning vector; R2K-ori; Km-resistance; IPTG-inducible P <sub>trc</sub> -promoter                                                                                       | Silva-Rocha <i>et al.</i> , 2013     |
| pSEVA434                       | Cloning vector; pBBR1-ori; Sm/Sp-resistance; IPTG-inducible P <sub>trc</sub> -promoter                                                                                  | Silva-Rocha <i>et al.</i> , 2013     |
| pBAMD1-2                       | Mini-Tn5 cloning vector for random chromosomal integration of DNA within mosaic sites; backbone-resistance: Ap; insert resistance: Km                                   | Martínez-García <i>et al.</i> , 2014 |
| pSEVA224- <i>cscA</i>          | Derivative of pSEVA224; <i>cscA</i> gene from <i>E. coli</i> W integrated into the MCS with EcoRI and BamHI                                                             | This work                            |
| pSEVA434- <i>cscB</i>          | Derivative of pSEVA434; <i>cscB</i> gene from <i>E. coli</i> W integrated into the MCS with BamHI and HindIII                                                           | This work                            |
| pSEVA224- <i>cscAB</i>         | Derivative of pSEVA224- <i>cscA</i> ; <i>cscB</i> gene from <i>E. coli</i> W integrated into the MCS with BamHI and HindIII                                             | This work                            |
| pBAMD1-2- <i>cscA</i>          | Derivative of pBAMD1-2; <i>cscA</i> gene from pSEVA224- <i>cscA</i> integrated into the MCS with SacI and PstI                                                          | This work                            |
| pBAMD1-2- <i>cscAB</i>         | Derivative of pBAMD1-2; <i>cscAB</i> gene from pSEVA224- <i>cscAB</i> integrated into the MCS with SacI and PstI                                                        | This work                            |
| pRK600                         | Helper plasmid for conjugation; ColE1 <i>ori</i> ; Cm-resistance; RK2 ( <i>mob</i> <sup>+</sup> <i>tra</i> <sup>+</sup> )                                               | Kessler <i>et al.</i> , 1992         |
| pVLT_ <i>gfp</i>               | Derivative of pVLT31; GFP was cloned into the multiple cloning site with the restriction enzymes XmaI and HindIII                                                       | Pflüger-Grau, unpublished            |
| pVLT_ <i>gfp</i> _SD           | Derivative of pVLT31; GFP was cloned into the multiple cloning site with the restriction enzymes SacI and HindIII with start codon and a suitable ribosome binding site | Pflüger-Grau <i>et al.</i> , 2011    |
| pVLT_ <i>cscB</i> - <i>gfp</i> | Derivative of pVLT_ <i>gfp</i> ; <i>cscB</i> was cloned in front of GFP with a peptide linker (GSAGSAAGSGEFSSSVPG) with the restriction enzymes EcoRI and SacI          | This work                            |

**Table S4** | Growth rates of individual clones of *P. putida::cscAB*. Shown are the growth rates of three independent experiments. The numbers are the mean and standard deviation of one experiment performed in triplicates. Note that the relative differences between the growth rates of the individual clones are conserved.

| Clone | Growth rate $\mu$ [ $\text{h}^{-1}$ ] |              |              |
|-------|---------------------------------------|--------------|--------------|
|       | Experiment 1                          | Experiment 2 | Experiment 3 |
| #12   | 0.376±0.018                           | 0.15±0.02    | 0.245±0.009  |
| #13   | 0.39±0.03                             | 0.17±0.03    | 0.122±0.005  |
| #14   | 0.37±0.05                             | 0.14±0.04    | 0.208±0.003  |
| #15   | 0.29±0.05                             | 0.13±0.04    | 0.237±0.008  |
| #16   | 0.395±0.004                           | 0.22±0.07    | 0.275±0.009  |
| #17   | 0.51±0.02                             | 0.27±0.03    | 0.30±0.02    |
| #18   | 0.29±0.07                             | 0.12±0.03    | 0.210±0.009  |
| #19   | 0.23±0.02                             | 0.173±0.016  | 0.215±0.014  |
| #20   | 0.357±0.019                           | 0.18±0.04    | 0.299±0.015  |
| #22   | 0.38±0.06                             | 0.17±0.05    | 0.273±0.017  |

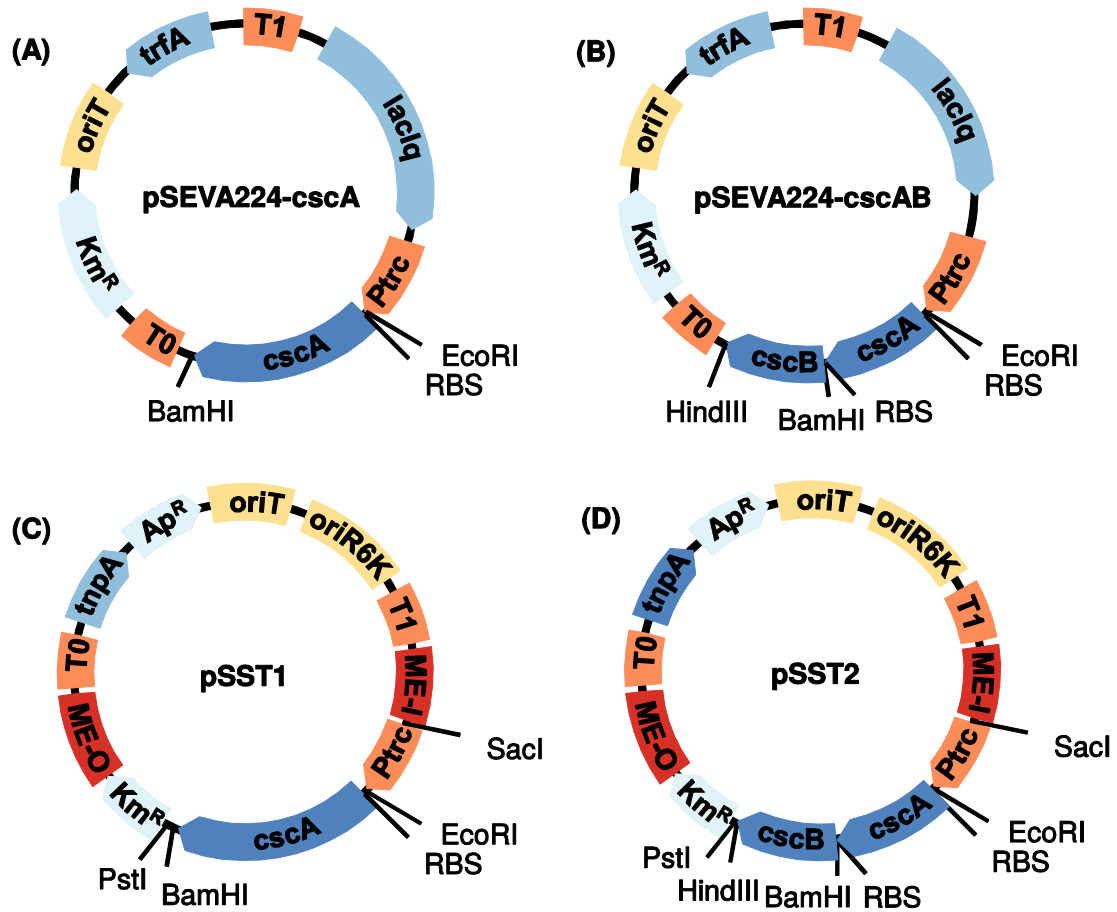

**Figure S1** | Schematic map of the vectors and plasmids constructed in this study. The two upper vectors (A and B) are derivatives of pSEVA224. The gene *cscA* or a polycistronic *cscAB* construct containing genes from the *csc* operon from *E. coli* W were amplified via the primers specified in Table S2. Vector and insert were cut via suitable restriction enzymes and ligated. The lower two vectors (C and D) show the same insert transferred to the (identical) multiple cloning site of the mini-transposon vector pBAMD1-2.

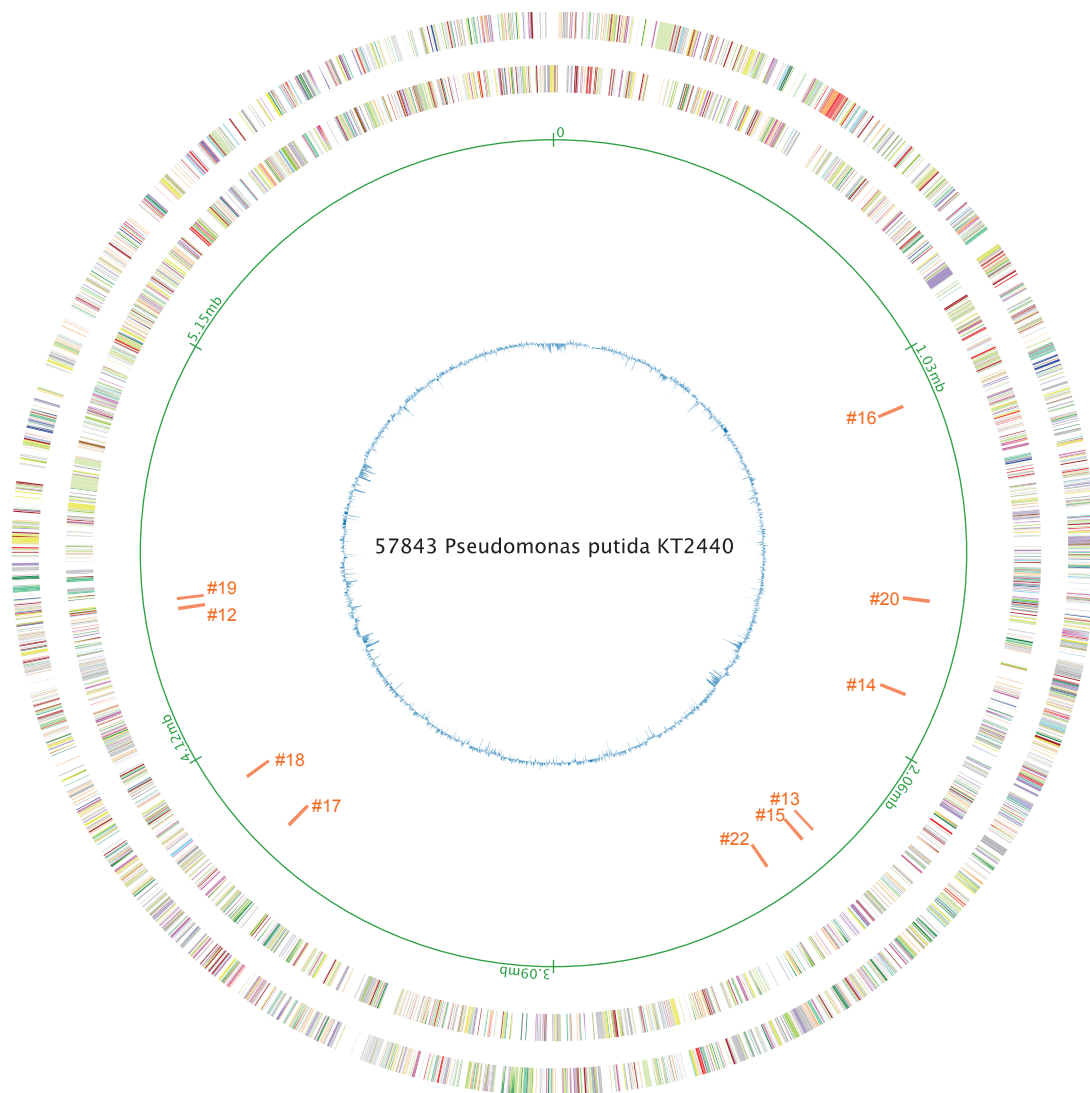

**Figure S2** | Localization of *cscAB* integration along the chromosome of *P. putida*. Shown are (from outside to inside): Ring 1: OFRS plus strand (colored by COG category); Ring 2: OFRS minus strand (colored by COG category); Ring 3 (green): Coordinates; Ring 4 (orange): insertion sites of the *cscAB* construct; Ring 5 (blue): GC percentage. The numbers correspond to the clone numbers (table 2).



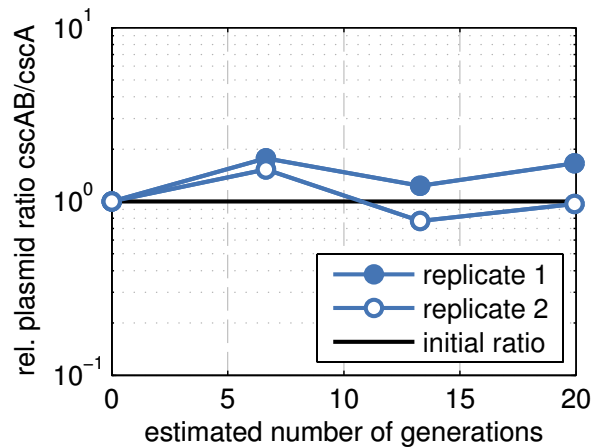

**Figure S3** | Competition of *P. putida* (pSEVA224-*cscA*) and *P. putida* (pSEVA224-*cscAB*) during growth on sucrose. The ratio of both plasmids over time with respect to the initial ratio within the corresponding culture is depicted for two independent cultures. Stationary phase cultures of *P. putida* (pSEVA224-*cscA*) and *P. putida* (pSEVA224-*cscAB*) grown on M9 medium with 15.2 mM glucose were mixed in a volumetric ratio of 1:1, plasmids were isolated from this mixed culture directly after mixing to determine the initial relative abundances of each plasmid. The cultures were incubated at 30°C and an 10  $\mu\text{L}$  aliquot was transferred every 24 h in fresh M9 medium with 16.7 mM sucrose. After each transfer, plasmids were isolated from the remaining culture with the NucleoSpin® plasmid Miniprep kit according to the suppliers manual for low copy plasmids. A 10  $\mu\text{L}$  aliquot of the eluate was digested with EcoRI HF (New England BioLabs, NEB) to linearize the plasmids and the whole restriction mixture (20  $\mu\text{L}$ ) was loaded on a 1 % agarose gel prestained with Roti®-GelStain (Carl Roth). The intensity of the bands corresponding to each plasmid was determined with the ImageJ Gel Analysis tool and the ratio of the plasmid abundance was calibrated to the DNA ladder (NEB) used for the gel. Note that even after 4 transfers, which should reflect about 20 generations, neither of the both plasmids significantly prevailed over the other, which suggests that none of the strains had a detectable selective advantage over the other.

## References

- Boyer, H.W. and Roulland-Dussoix, D. (1969) A complementation analysis of the restriction and modification of DNA in *Escherichia coli*. *J Mol Biol* **41**: 459–472.
- Grant, S.G., Jessee, J., Bloom, F.R., and Hanahan, D. (1990) Differential plasmid rescue from transgenic mouse DNAs into *Escherichia coli* methylation-restriction mutants. *Proc Natl Acad Sci U S A* **87**: 4645–4649.
- Kessler, B., de Lorenzo, V., and Timmis, K.N. (1992) A general system to integrate *lacZ* fusions into the chromosomes of gram-negative eubacteria: regulation of the *Pm* promoter of the TOL plasmid studied with all controlling elements in monocopy. *Mol Gen Genet* **233**: 293–301.
- Martínez-García, E., Aparicio, T., de Lorenzo, V., and Nikel, P.I. (2014) New transposon tools tailored for metabolic engineering of gram-negative microbial cell factories. *Front Bioeng Biotechnol* **2**: 46.
- Pflüger-Grau, K., Chavarría, M., and de Lorenzo, V. (2011) The interplay of the EIIA<sup>Ntr</sup> component of the nitrogen-related phosphotransferase system (PTS<sup>Ntr</sup>) of *Pseudomonas putida* with pyruvate dehydrogenase. *Biochim. Biophys. Acta* **1810**: 995–1005.
- Silva-Rocha, R., Martínez-García, E., Calles, B., Chavarría, M., Arce-Rodríguez, A., Las Heras, de, A., et al. (2013) The Standard European Vector Architecture (SEVA): a coherent platform for the analysis and deployment of complex prokaryotic phenotypes. *Nucleic Acids Research* **41**: D666–75.
- Waksman, S.A. and Reilly, H.C. (1945) Agar-Streak Method for Assaying Antibiotic Substances. *Ind. Eng. Chem. Anal. Ed.* **17**: 556–558.
- Wilde, E. (1962) Untersuchungen über Wachstum und Speicherstoffsynthese von *Hydrogenomonas*. *Archiv. Mikrobiol.* **43**: 109–137.
